# Supplementary material
Source: Springer Nature journal article supplement (https://www.springermedizin.de/resource/supplementary/12936_2008_662_MOESM1_ESM.pdf/9547942)
Supplement: MOESM1 [file 9547942]

## PEPTIDE EPOXYKETONES

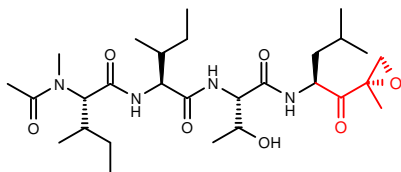

Epoxomicin

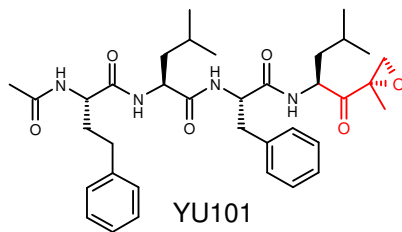

YU101

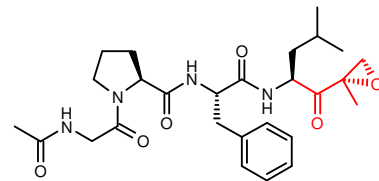

YU102

## PEPTIDE ALDEHYDES

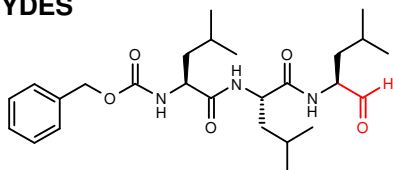

MG132

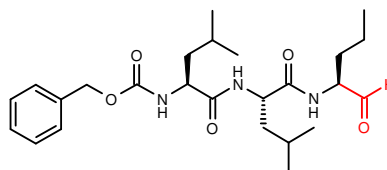

MG115

## PEPTIDE VINYL SULFONES

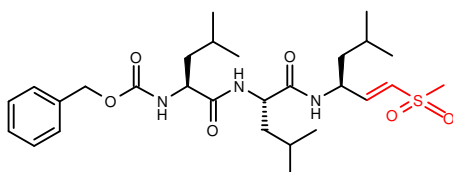

Z-L<sub>3</sub>-VS

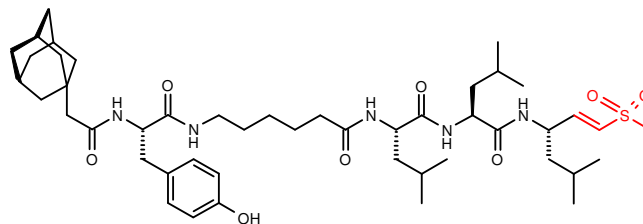

Ada-Ahx<sub>3</sub>-L<sub>3</sub>-VS

## PEPTIDE BORONATE

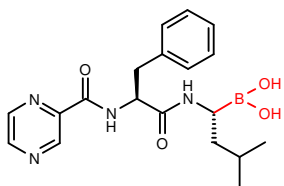

Bortezomib  
(Velcade)

## β-LACTONE

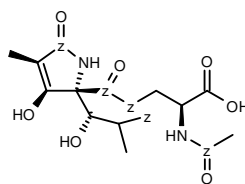

Lactacystin

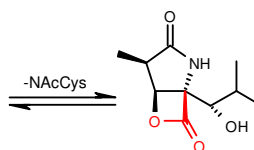

Clasto-lactacystin-β-lactone (omuralide)

## ALLOSTERIC INHIBITORS

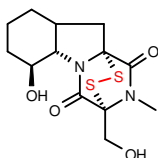

Gliotoxin

H-R-R-R-P-R-P-P-Y-L-P-R-P-  
R-P-P-P-F-F-P-P-R-L-P-P-R-I-  
PP-G-F-P-P-R-F-P-P-R-F-P-OH

PR39

H-R-R-R-P-R-P-P-Y-L-P-R-OH

PR11
